# Supplementary material for: Dependence of surface stress, surface energy and surface tension on potential and charge
Source: Royal Society of Chemistry journal article supplement (doi:10.1039/b710065e), 2007-11-16
Supplement: b710065e.pdf [file b710065e.pdf]

---

# Dependence of surface stress, surface energy and surface tension on potential and charge

## — Supplementary information —

Electronic Supplementary Information (ESI) of Phys. Chem. Chem. Phys.

DOI of the main article: **10.1039/b710065e**

**Dominik Kramer**\*

Institut für Nanotechnologie (INT), Forschungszentrum Karlsruhe,  
Postfach 3640, 76021 Karlsruhe, Germany

Table S1: Examples of either linear  $f(q)$  or parabolic  $f(E)$  surface stress response to charging

Figures S1, S2 and S3.

---

\* Corresponding author. Tel.: +49 +7247 82 6379, Fax.: +49 +7247 82 6368  
E-mail address: [Dominik.Kramer@int.fzk.de](mailto:Dominik.Kramer@int.fzk.de) (D. Kramer)

**Table S1.** Examples of either linear  $f(q)$  or parabolic  $f(E)$  surface stress response to charging. Other published surface stress curves are more complex, *e.g.* showing slope changes or several extrema like those in <sup>3,38,65</sup>. Unless noted otherwise, measurements have been done with polycrystalline electrodes.

| Electrode |                                                    | Electrolyte                                                                                              | Appearance                               | Ref.                                                                            | 1 <sup>st</sup> Autor | Year                   |
|-----------|----------------------------------------------------|----------------------------------------------------------------------------------------------------------|------------------------------------------|---------------------------------------------------------------------------------|-----------------------|------------------------|
| Au        | ribbon                                             | 0.1 M KCl                                                                                                | parabolic                                | Fig. 2 of <sup>4</sup>                                                          | Beck                  | 1969                   |
| Au<br>Pt  | 1 $\mu$ m film on glass<br>1 $\mu$ m film on glass | 0.1 M KCl,<br>1.67·10 <sup>-3</sup> N H <sub>2</sub> SO <sub>4</sub>                                     | partially<br>parabolic                   | Fig. 1 of <sup>13</sup> ,<br>Fig. 2 of <sup>13</sup>                            | Fredlein              | 1971                   |
| Pb        | 1.2 mm piece                                       | 0.15 M KBr +<br>0.5 M Na <sub>2</sub> SO <sub>4</sub>                                                    | partially parabolic<br>(linear $df/dq$ ) | Fig. 1.3 of <sup>58</sup><br>(Fig. 4 of <sup>59</sup> )                         | Gokhshtein            | 1971                   |
| Au        | 1 $\mu$ m film on glass                            | HClO <sub>4</sub>                                                                                        | parabolic                                | Fig. 5 of <sup>12</sup>                                                         | Fredlein              | 1974                   |
| Au        | ribbon                                             | K <sub>2</sub> SO <sub>4</sub>                                                                           | parabolic                                | Figs. 4 and 12 of <sup>14</sup>                                                 | Lin                   | 1976                   |
| Pt        | 25 $\mu$ m strip                                   | 0.05 M H <sub>2</sub> SO <sub>4</sub>                                                                    | parabolic                                | Fig. 3 of <sup>15</sup>                                                         | Pangarov              | 1978                   |
| Au        | 90 $\mu$ m foil on piezo                           | 0.8 M NaF                                                                                                | roughly parabolic                        | Fig. 2 of <sup>66</sup>                                                         | Fredlein              | 1979                   |
| C         | porous                                             | 5 M NaCl                                                                                                 | parabolic                                | Figs. 2, 4, 5 of <sup>16</sup>                                                  | Oren                  | 1986                   |
| C         | 12 cm porous piece                                 | 5 M NaCl                                                                                                 | parabolic                                | Fig. 4 of <sup>17</sup>                                                         | Golub                 | 1987                   |
| Au        | film on quartz                                     | 2 mM KF                                                                                                  | parabolic                                | Fig. 5 of <sup>64</sup>                                                         | Jaeckel               | 1994                   |
| Au        | film on quartz                                     | 0.1 M K <sub>2</sub> SO <sub>4</sub>                                                                     | parabolic                                | Figs. 6 and 8 of <sup>19</sup>                                                  | Láng                  | 1995                   |
| Au<br>Pt  | 50 nm film<br>60 nm film                           | 0.1 M KCl<br>0.1 M NaClO <sub>4</sub> +<br>NaOH                                                          | parabolic<br>parabolic                   | Fig. 2 (a) of <sup>18</sup><br>Fig. 2 (b) of <sup>18</sup>                      | Raiteri               | 1995                   |
| Au        | 100 nm film on<br>quartz                           | KClO <sub>4</sub> + x mM<br>pyridine                                                                     | partially parabolic                      | Figs. 3, 5, 6, 7 of <sup>63</sup>                                               | Efimov                | 1996                   |
| Au(111)   | 200 nm film on<br>glass                            | 0.1 M H <sub>2</sub> SO <sub>4</sub> + 1 mM<br>CuSO <sub>4</sub> + 1 mM<br>(CsBr or CsCl)                | linear $f(q)$<br>( $I(E) \propto f(E)$ ) | Figs. 2 and 3 of <sup>40</sup>                                                  | Haiss                 | 1996                   |
| Au(111)   | 30 nm film on<br>cantilever                        | 0.1 M KCl                                                                                                | parabolic                                | Fig. 2 of <sup>22</sup> and<br>Fig. 2 of <sup>23</sup>                          | O'Shea,<br>Brunt      | 1996                   |
| Metal     | jellium model                                      | 1-1 electrolyte                                                                                          | parabolic                                | Fig. 1 of <sup>20</sup>                                                         | Schmickler            | 1998                   |
| Au        | 0.25 mm plate                                      | HClO <sub>4</sub> , KClO <sub>4</sub>                                                                    | partially parabolic<br>(linear $df/dq$ ) | Figs. 4 and 5 of <sup>42</sup>                                                  | Valincius             | 1998                   |
| Au(111)   | single crystal                                     | 0.1 M HClO <sub>4</sub>                                                                                  | linear $f(q)$                            | Fig. 3 of <sup>31</sup>                                                         | Ibach                 | 1999                   |
| Au(100)   | single crystal                                     | 0.1 M HClO <sub>4</sub>                                                                                  | parabolic                                | Fig. 4 of <sup>31</sup>                                                         | Ibach                 | 1999                   |
| Au(111)   | 200 nm film on<br>glass                            | 0.1 M HClO <sub>4</sub> , 1 M<br>H <sub>2</sub> SO <sub>4</sub> , 0.1 M HClO <sub>4</sub><br>+ 5 mM CsCl | linear $f(q)$                            | Fig. 2 of <sup>28</sup> , Fig. 5<br>of <sup>29</sup> , Fig. 18 of <sup>30</sup> | Haiss                 | 1998,<br>2002,<br>2001 |
| Pt        | porous,<br>nanocrystalline                         | 1 M KOH,<br>0.5 M H <sub>2</sub> SO <sub>4</sub>                                                         | linear $f(q)$                            | Fig. 2. of <sup>2</sup> ,<br>Fig. 3. of <sup>2</sup>                            | Weissmüller           | 2003                   |
| Au        | porous                                             | 0.05 M H <sub>2</sub> SO <sub>4</sub> .                                                                  | linear $f(q)$                            | Fig. 2 of <sup>32</sup>                                                         | Kramer                | 2004                   |
| Pt        | porous,<br>nanocrystalline                         | 0.02 M...1 M NaF                                                                                         | linear $f(q)$                            | Fig. 2 of <sup>33</sup>                                                         | Viswanath             | 2005                   |
| Pt        | 150 nm film on<br>glass                            | 1 M HClO <sub>4</sub> 0.8 M<br>HCOOH<br>1 M H <sub>2</sub> SO <sub>4</sub> 0.8 M<br>HCOOH                | parabolic<br>parabolic                   | Fig. 3 c of <sup>24</sup><br>Fig. 7 b of <sup>24</sup>                          | Láng                  | 2005                   |
| Au(111)   | 100 nm film on<br>silicon                          | 0.1 M HClO <sub>4</sub>                                                                                  | linear $f(q)$                            | Fig. 29 of <sup>34</sup>                                                        | Tabard-<br>Cossa      | 2005                   |
| Pt        | porous,<br>nanocrystalline                         | 0.7 M NaF                                                                                                | linear $f(q)$                            | Figs. 5 and 8 of <sup>35</sup>                                                  | Viswanath             | 2007                   |

**Fig. S1.** Schematic illustration of two states of an electrode, described by the independent parameters  $\gamma$  and  $A$ , and of two paths of parameter variation.

$\gamma$  is a function of the potential, it decreases if an uncharged electrode is charged. Due to the conservation of energy, different reversible ways to change the state of the electrode from its initial values  $\gamma_0$  and  $A_0$  to  $\gamma$  and  $A_1$  will require the same total energy.

A) For the path A, the surface of area  $A_0$  is charged starting at the *pzc* (blue dot), followed by a change in area at constant potential (and at constant  $\gamma$ ), *e.g.* by reversible cleavage of a crystal. During this step, the electrical work  $q\phi(A_1 - A_0)$  is done by the potentiostat which keeps the potential at the given value  $\phi$ , in addition to the mechanical work  $\gamma(A_1 - A_0)$  required to do the change in area. For the path B, the surface area is increased first, at the constant potential  $\phi = 0$ . For A, the work done is  $W_A = A_0\omega + (A_1 - A_0)\gamma + q\phi(A_1 - A_0)$ , for path B,  $W_B = (A_1 - A_0)\gamma_0 + A_1\omega$ , with  $\omega = \alpha\phi$  being the electrical work per area of charging of the surface starting from  $q = 0$ , Eq. (15) and Eq. (16).

B) The diagram is simpler if unit areas are considered. In that case, the surface energy of the unit area (red dot at  $A_1 = 1$ ) is seen to be given by Eq. (18).

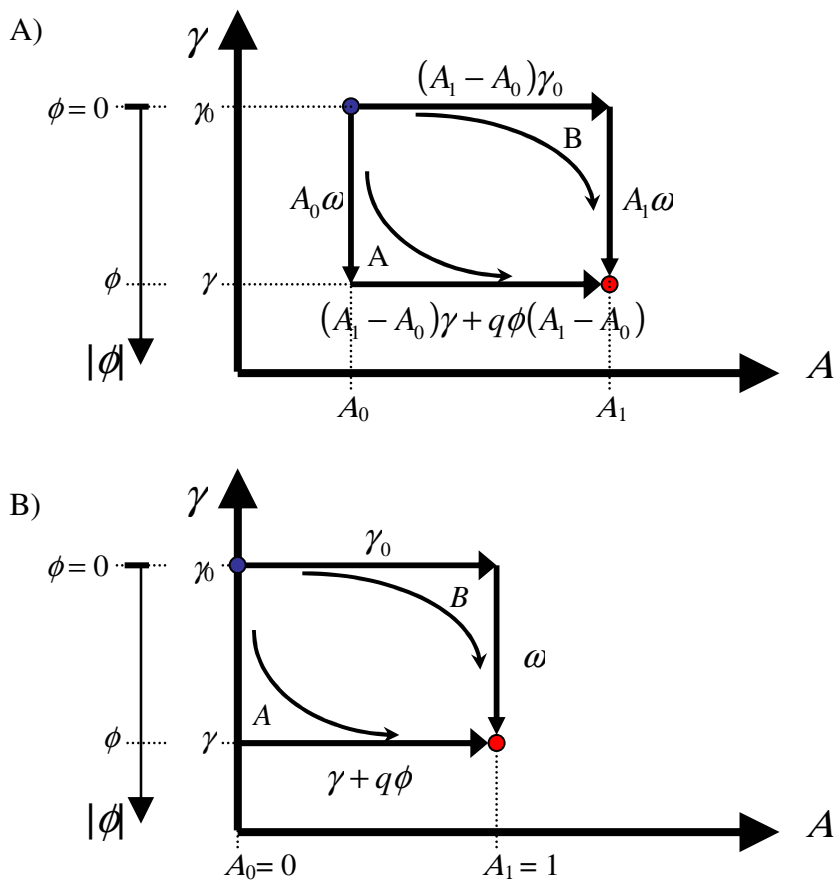

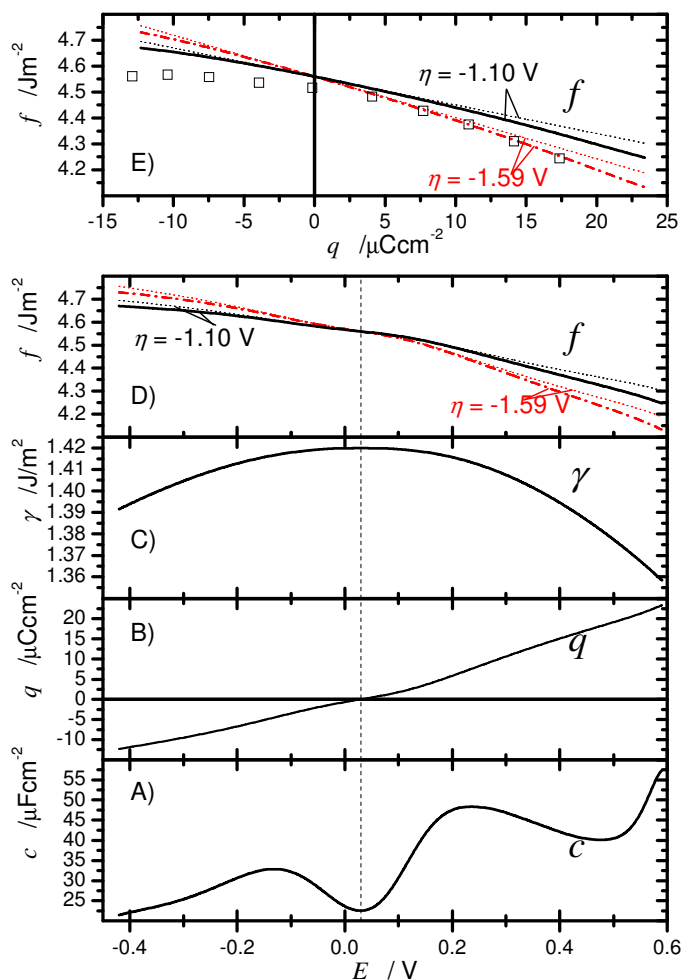

**Fig. S2:** Application of the model to the unreconstructed Au(100) surface, demonstrating the effect of different values of  $\eta$ .

**A)** Double layer capacity curve of an Au(100) surface in 10 mM HClO<sub>4</sub>, after lifting of the reconstruction by a potential sweep. Data values taken from Fig. 3(a) of <sup>56</sup>.

**B)** Charge density  $q$  obtained by integration of A). **C)** Surface tension  $\gamma(E)$  obtained by integration of B) and by using the vacuum value of the surface tension at the  $pzc$ ,  $\gamma_0 = 1.42 \text{ J/m}^2$  <sup>30</sup>, neglecting that  $\gamma_0$  of the solid-liquid phase will differ from the vacuum value.

**D)** and **E)** Surface stress  $f$  of the Au(100) surface according to the model, Eq. (46), calculated using  $k=0.1$  for weak adsorption. Perchlorate is considered weakly adsorbing, but specific adsorption occurs on gold <sup>56</sup>, therefore, this low but nonzero  $k$  value seems reasonable. Black curves:  $\eta = -1.10 \text{ V}$ . Red curves:  $\eta = -1.59 \text{ V}$ , which is the  $\Delta f/\Delta q$  value given by IBACH, based on a fit of experimental data with straight line for positive charge only <sup>31</sup>. At the  $pzc$ , the vacuum surface stress value,  $f_0 = 4.56 \text{ J/m}^2$ , <sup>30</sup> has been used. The squares in E) have been obtained by adding a constant to the experimental  $\Delta f$  values given by IBACH <sup>31</sup>. The dotted lines give the  $\eta q$  part of  $f$ , demonstrating that the surface tension term of Eq. (46) is much smaller than  $\eta q$ . Since the surface stress of the uncharged surface is large, the maximum relative variation  $\Delta f/f$  is still less than 10%.

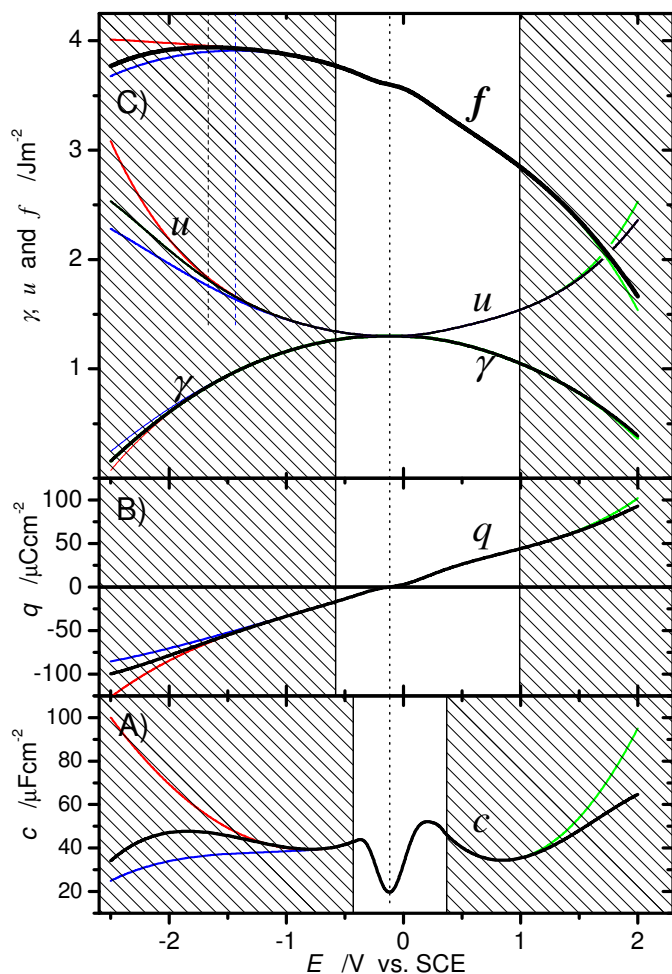

**Fig. S3:** Demonstration of some important consequences of the model

*i)* The predicted  $f(E)$  is roughly parabolic, which is apparent here due to the huge potential window of the graph. The approximation of  $f$  to a ideal parabola is not as good as that of  $\gamma$  which is almost parabolic. *ii)* The maximum of  $f$  can be shifted considerably compared to the maximum of  $\gamma$  at the  $pzc$  (by more than 1.3 V and by more than  $2.5 \text{ Jm}^{-2}$  for the example shown here). *iii)* Within the accessible potential window, the variation of  $f$  can be much larger than that of  $\gamma$ .

The shaded areas of B) and C) are intended to indicate potentials which are hardly accessible in aqueous solutions.

**A)** Capacitance of the double layer which is used to predict  $\gamma$  and  $f$ . The values of the non-shaded area have been taken from the Fig. 3(c) of <sup>56</sup> and correspond to the capacity of an (unreconstructed) Au(210) surface in 10 mM  $\text{HClO}_4$ . The curves within the shaded area of A) are different arbitrary extrapolations.

**B)** Charge densities  $q$  obtained by integration of the capacitances of A).

**C)** Surface tension  $\gamma$  obtained by integration of the charge densities B) and by assuming  $\gamma_0 = 1.3 \text{ Jm}^{-2}$ , surface energy  $u$  according to Eq. (18) (neglecting adsorption) and surface stress  $f$  according Eq. (46) of the simple toy model and by assuming  $f_0 = 3.6 \text{ Jm}^{-2}$ ,  $k = 0.1$  (weak adsorption) and  $\eta = -1.2 \text{ V}$ .
